# Supplementary material for: Reproducing Polychronization: A Guide to Maximizing the Reproducibility of Spiking Network Models
Source: PubMed Central journal article supplement (PMC6085985; doi:10.3389/fninf.2018.00046), 2018-08-03
Supplement: Data_Sheet_1.pdf [file Data_Sheet_1.pdf]

**Checklist for Authors and Reviewers to  
Maximize Reproducibility of Spiking Neural Network Models**

| Make code available and executable |                                                                                                                                             |
|------------------------------------|---------------------------------------------------------------------------------------------------------------------------------------------|
| <input type="checkbox"/>           | Share the model of your code on a model hosting site (e.g. ModelDB, Open SourceBrain) or a general purpose service (e.g. GitHub, Bitbucket) |
| <input type="checkbox"/>           | Provide an installation guide for all dependencies and the model itself                                                                     |
| <input type="checkbox"/>           | Use a version control system and tag the used version                                                                                       |
| <input type="checkbox"/>           | Provide provenance tracking to explicitly declare versions of all used software                                                             |

| Make code comprehensible and testable |                                                     |
|---------------------------------------|-----------------------------------------------------|
| <input type="checkbox"/>              | Modularize the code                                 |
| <input type="checkbox"/>              | Encapsulate the code                                |
| <input type="checkbox"/>              | Write flexible code                                 |
| <input type="checkbox"/>              | Apply unit tests                                    |
| <input type="checkbox"/>              | Comment the code with natural language              |
| <input type="checkbox"/>              | Use meaningful parameter names                      |
| <input type="checkbox"/>              | Use parameter files containing all model parameters |
| <input type="checkbox"/>              | Use tables to document all model parameters         |

| Reduce risk of implementation dependencies |                                      |
|--------------------------------------------|--------------------------------------|
| <input type="checkbox"/>                   | Use standard tools wherever possible |
| <input type="checkbox"/>                   | Use standard numerics                |
| <input type="checkbox"/>                   | Perform multiple realizations        |
| <input type="checkbox"/>                   | Test model robustness                |

Version 1.0  
26.06.2018

# 1 Supplementary Material

## 1.1 Changes to the original C++ code

To reproduce the results in the manuscript, we used the C++ implementation of the model `poly_spnet.cpp` from Izhikevich's website (<http://www.izhikevich.org/publications/spnet.htm>). Unfortunately, the C++ code can not be compiled with the standard g++ compiler under Ubuntu 16.04 LTS.

Following adaptations were made to compile the code:

- line 1: `#include <iostream.h>` -> `#$include <iostream>`
- change all occurrences of `'cout'` to `'std::cout'`
- line 764: `void main()` -> `int main()`

After successful compilation we had to fix a few runtime errors:

- Comment out line 955
- Comment out line 957

After these changes the simulation and analysis ran through but did not save the data about polychronous groups. To change this:

- Comment in line 691 to 697

To avoid the computation with shuffled data (and possibly overwriting data):

- Comment out line 957 to 960

## 2 Network Description

1 shows the parameter for the network model.

| <b>A</b>       |                                                                                                                           | <b>Model summary</b>                                   |  |
|----------------|---------------------------------------------------------------------------------------------------------------------------|--------------------------------------------------------|--|
| Populations    | Two                                                                                                                       |                                                        |  |
| Topology       | None                                                                                                                      |                                                        |  |
| Connectivity   | Population specific                                                                                                       |                                                        |  |
| Neuron model   | Izhikevich                                                                                                                |                                                        |  |
| Channel models | None                                                                                                                      |                                                        |  |
| Synapse model  | $\delta$ current input                                                                                                    |                                                        |  |
| Plasticity     | Izhikevich STDP                                                                                                           |                                                        |  |
| Measurements   | Spike activity                                                                                                            |                                                        |  |
| <b>B</b>       |                                                                                                                           | <b>Populations</b>                                     |  |
| Name           | Elements                                                                                                                  | Size                                                   |  |
| Exc            | Izhikevich                                                                                                                | 800                                                    |  |
| Inh            | Izhikevich                                                                                                                | 200                                                    |  |
| <b>C</b>       |                                                                                                                           | <b>Connectivity</b>                                    |  |
| Source         | Target                                                                                                                    | Pattern                                                |  |
| Exc            | Exc + Inh                                                                                                                 | Random, fixed-outdegree 100, plastic, initial weight 6 |  |
| Inh            | Exc                                                                                                                       | Random fixed-outdegree 100, static, weight $-5$        |  |
| <b>D</b>       |                                                                                                                           | <b>Neuron and synapse model</b>                        |  |
| Type           | Izhikevich                                                                                                                |                                                        |  |
| Dynamics       | $v = v + h0.5(0.04V + 5)v + 140 - u + I + I_{syn}$ $v = v + h0.5(0.04V + 5)v + 140 - u + I + I_{syn}$ $u = u + ha(0.2vu)$ |                                                        |  |

Table 1: Description of the network model (according to Nordlie 2009).

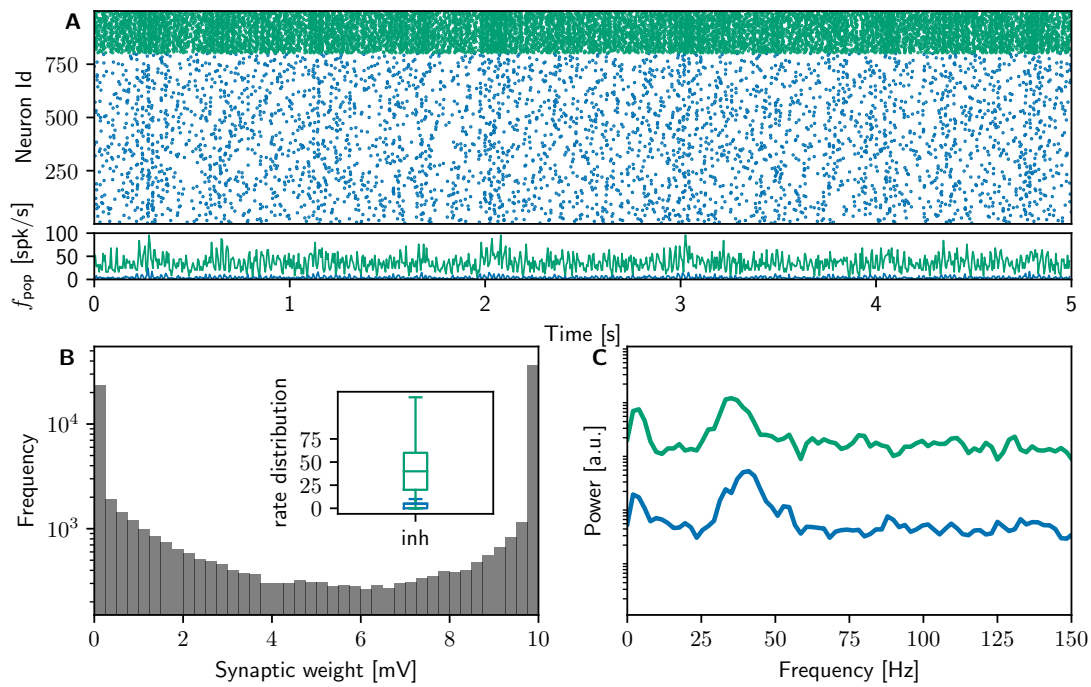

| <b>A</b> simulation-params       |                    |
|----------------------------------|--------------------|
| rec_spikes                       | 10000.0            |
| resolution                       | 1.0                |
| sim-time                         | 18000000.0         |
| rec_mem                          | 0.0                |
| synapse-update-interval          | 1000               |
| neuron-integration-steps         | 1                  |
| data-path                        | data/NEST_model/   |
| <b>B</b> stimulus                |                    |
| rate                             | 40.0               |
| distribution                     | poisson            |
| type                             | generate           |
| weight                           | 10.0               |
| <b>C</b> plasticity              |                    |
| W_inh                            | -5.0               |
| synapse-model                    | stdp_izh_synapse   |
| Wmax                             | 10.0               |
| W_init                           | 6.0                |
| LTP                              | 0.1                |
| tau_syn_update_interval          | 10000.0            |
| reset_weight_change_after_update | False              |
| constant_additive_value          | 0.01               |
| LTD                              | -0.12              |
| <b>D</b> connectivity            |                    |
| type                             | generate           |
| delay-distribution               | uniform-non-random |
| delay-range                      | [1, 21]            |
| <b>E</b> initial-state           |                    |
| type                             | generate           |
| distribution                     | uniform            |
| V_m-range                        | [-65, -55]         |

Parameters for experiment poisson stimulus

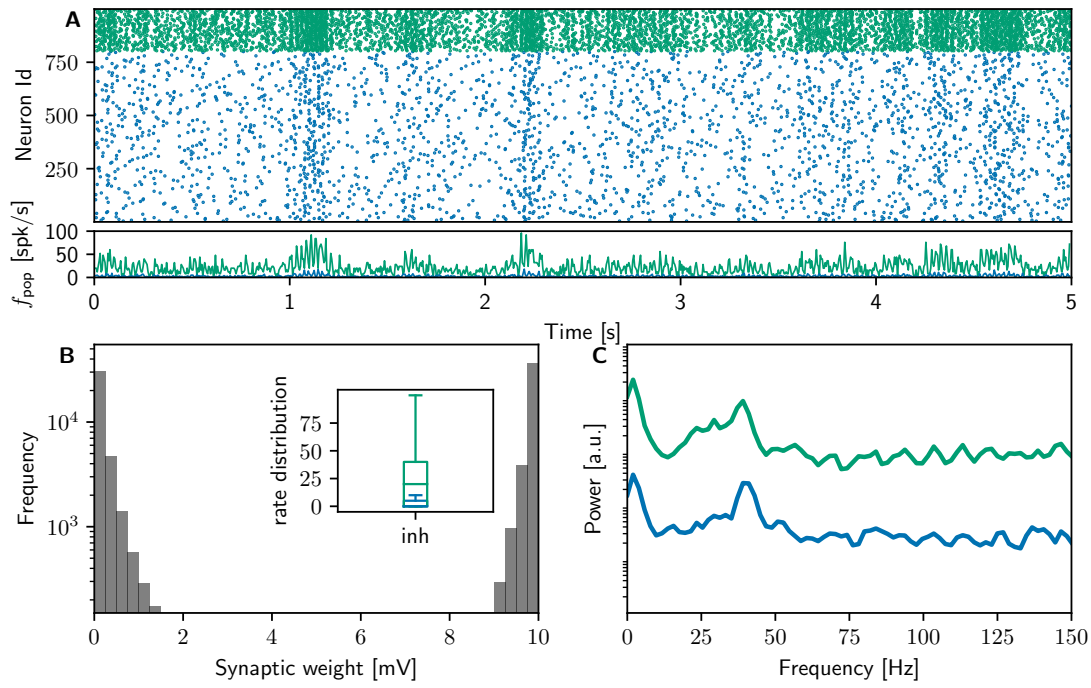

| A simulation-params              |                    |
|----------------------------------|--------------------|
| rec_spikes                       | 10000.0            |
| resolution                       | 1.0                |
| sim-time                         | 18000000.0         |
| rec_mem                          | 0.0                |
| synapse-update-interval          | 1000               |
| neuron-integration-steps         | 1                  |
| data-path                        | data/NEST_model/   |
| B stimulus                       |                    |
| distribution                     | original           |
| type                             | generate           |
| C plasticity                     |                    |
| W_inh                            | -5.0               |
| synapse-model                    | stdp_izh_synapse   |
| Wmax                             | 10.0               |
| W_init                           | 6.0                |
| LTP                              | 0.1                |
| tau_syn_update_interval          | 0.0                |
| reset_weight_change_after_update | True               |
| constant_additive_value          | 0.0                |
| LTD                              | -0.12              |
| D connectivity                   |                    |
| type                             | generate           |
| delay-distribution               | uniform-non-random |
| delay-range                      | [1, 21]            |
| E initial-state                  |                    |
| type                             | generate           |
| distribution                     | uniform            |
| V_m-range                        | [-65, -55]         |

Parameters for experiment time driven additive 1s

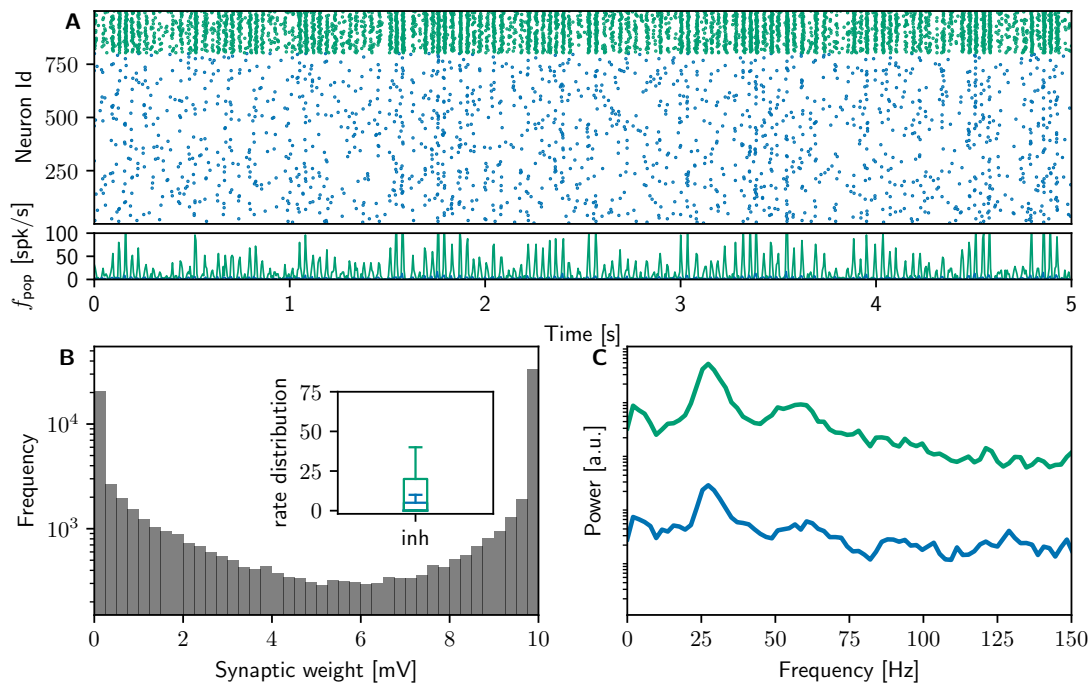

| <b>A</b> simulation-params       |                  |
|----------------------------------|------------------|
| rec_spikes                       | 10000.0          |
| resolution                       | 1.0              |
| sim-time                         | 18000000.0       |
| rec_mem                          | 0.0              |
| synapse-update-interval          | 1000             |
| neuron-integration-steps         | 1                |
| data-path                        | data/NEST_model/ |
| <b>B</b> stimulus                |                  |
| distribution                     | original         |
| type                             | generate         |
| <b>C</b> plasticity              |                  |
| W_inh                            | -5.0             |
| synapse-model                    | stdp_izh_synapse |
| Wmax                             | 10.0             |
| W_init                           | 6.0              |
| LTP                              | 0.1              |
| tau_syn_update_interval          | 10000.0          |
| reset_weight_change_after_update | False            |
| constant_additive_value          | 0.01             |
| LTD                              | -0.12            |
| <b>D</b> connectivity            |                  |
| type                             | generate         |
| delay-distribution               | uniform-random   |
| delay-range                      | [1, 6]           |
| <b>E</b> initial-state           |                  |
| type                             | generate         |
| distribution                     | uniform          |
| V_m-range                        | [-65, -55]       |

Parameters for experiment delay distribution 5

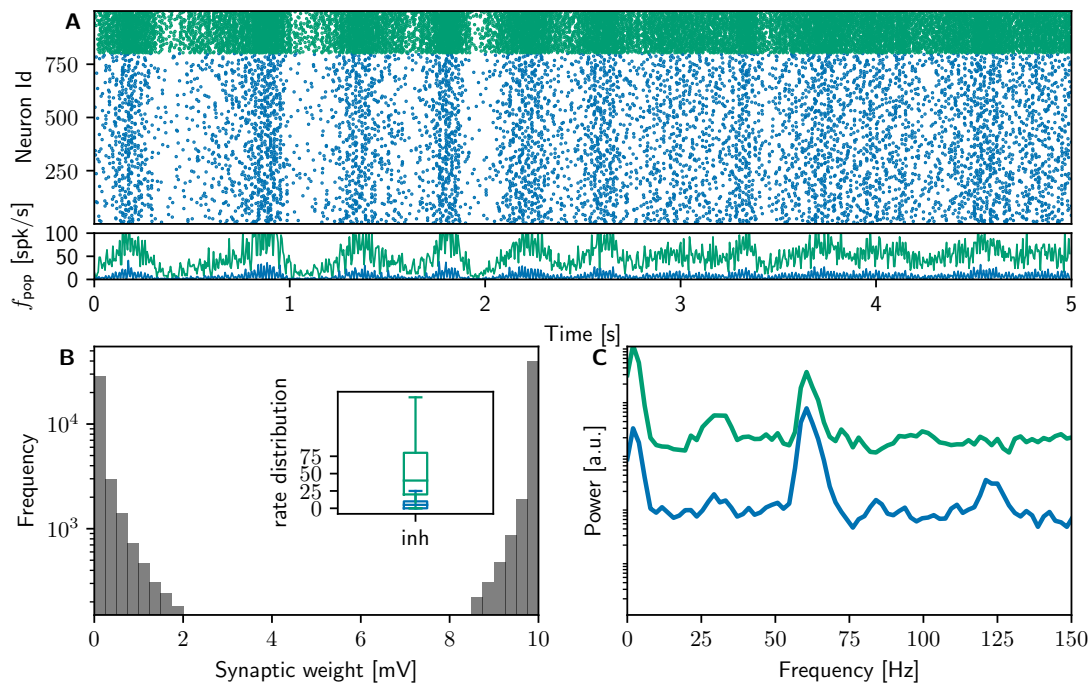

| <b>A</b> simulation-params       |                    |
|----------------------------------|--------------------|
| rec_spikes                       | 10000.0            |
| resolution                       | 1.0                |
| sim-time                         | 18000000.0         |
| rec_mem                          | 0.0                |
| synapse-update-interval          | 1000               |
| neuron-integration-steps         | 1                  |
| data-path                        | data/NEST_model/   |
| <b>B</b> stimulus                |                    |
| distribution                     | original           |
| type                             | generate           |
| <b>C</b> plasticity              |                    |
| W_inh                            | -5.0               |
| synapse-model                    | stdp_izh_synapse   |
| Wmax                             | 10.0               |
| W_init                           | 6.0                |
| LTP                              | 0.1                |
| tau_syn_update_interval          | 2000.0             |
| reset_weight_change_after_update | False              |
| constant_additive_value          | 0.01               |
| LTD                              | -0.12              |
| <b>D</b> connectivity            |                    |
| type                             | generate           |
| delay-distribution               | uniform-non-random |
| delay-range                      | [1, 21]            |
| <b>E</b> initial-state           |                    |
| type                             | generate           |
| distribution                     | uniform            |
| V_m-range                        | [-65, -55]         |

Parameters for experiment tau syn update interval 2s

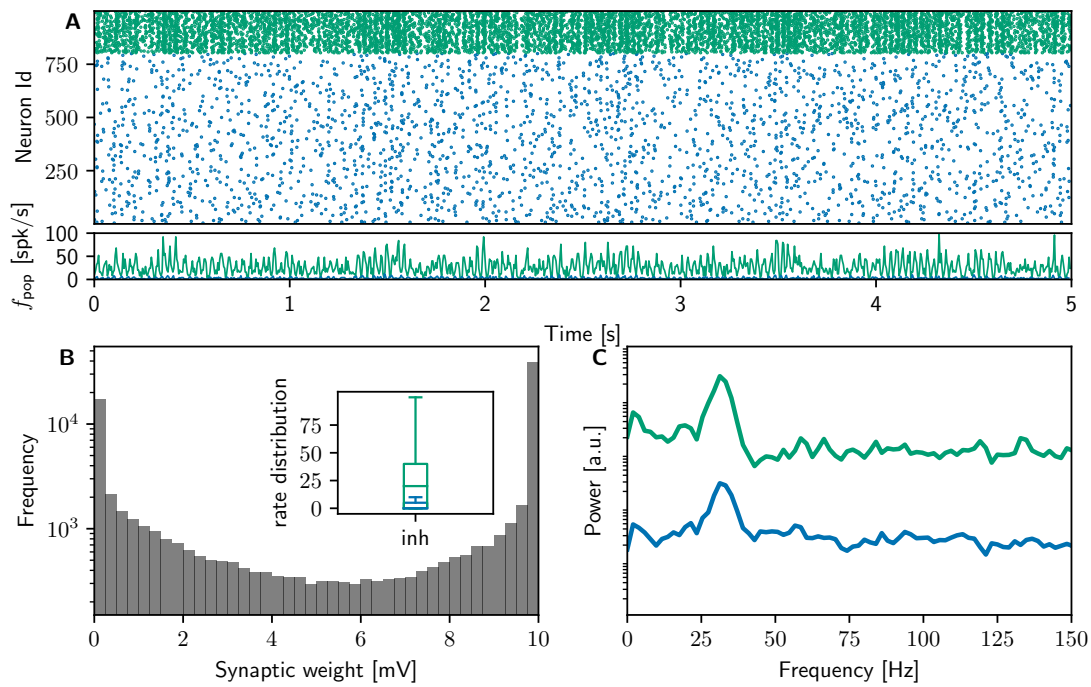

| <b>A</b> simulation-params       |                    |
|----------------------------------|--------------------|
| rec_spikes                       | 10000.0            |
| resolution                       | 1.0                |
| sim-time                         | 18000000.0         |
| rec_mem                          | 0.0                |
| synapse-update-interval          | 1000               |
| neuron-integration-steps         | 10                 |
| data-path                        | data/NEST_model/   |
| <b>B</b> stimulus                |                    |
| distribution                     | original           |
| type                             | generate           |
| <b>C</b> plasticity              |                    |
| W_inh                            | -5.0               |
| synapse-model                    | stdp_izh_synapse   |
| Wmax                             | 10.0               |
| W_init                           | 6.0                |
| LTP                              | 0.1                |
| tau_syn_update_interval          | 10000.0            |
| reset_weight_change_after_update | False              |
| constant_additive_value          | 0.01               |
| LTD                              | -0.12              |
| <b>D</b> connectivity            |                    |
| type                             | generate           |
| delay-distribution               | uniform-non-random |
| delay-range                      | [1, 21]            |
| <b>E</b> initial-state           |                    |
| type                             | generate           |
| distribution                     | uniform            |
| V_m-range                        | [-65, -55]         |

Parameters for experiment qualitative model high res



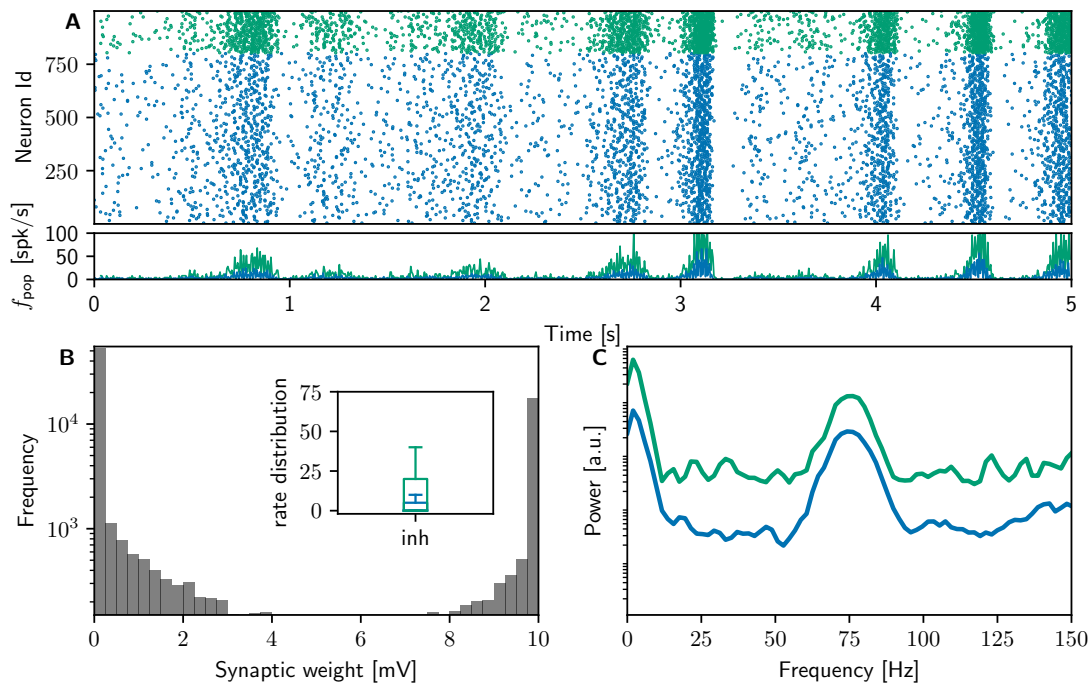

| A simulation-params      |                                                                  |
|--------------------------|------------------------------------------------------------------|
| rec_spikes               | 10000.0                                                          |
| resolution               | 1.0                                                              |
| sim-time                 | 18000000.0                                                       |
| rec_mem                  | 0.0                                                              |
| synapse-update-interval  | 1000                                                             |
| neuron-integration-steps | 1                                                                |
| data-path                | data/NEST_model/                                                 |
| B stimulus               |                                                                  |
| type                     | reproduce                                                        |
| from-file                | data/original_model/bitwise_reproduction/{rep}/stim.dat          |
| C plasticity             |                                                                  |
| W_inh                    | -5.0                                                             |
| synapse-model            | stdp_izh_new_naive_synapse                                       |
| Wmax                     | 10.0                                                             |
| W_init                   | 6.0                                                              |
| LTP                      | 0.1                                                              |
| LTD                      | -0.12                                                            |
| D connectivity           |                                                                  |
| type                     | reproduce                                                        |
| from-file                | data/original_model/bitwise_reproduction/{rep}/connectivity.json |
| E initial-state          |                                                                  |
| type                     | reproduce                                                        |
| from-file                | data/original_model/bitwise_reproduction/{rep}/vuinit.dat        |

Parameters for experiment stdp window match

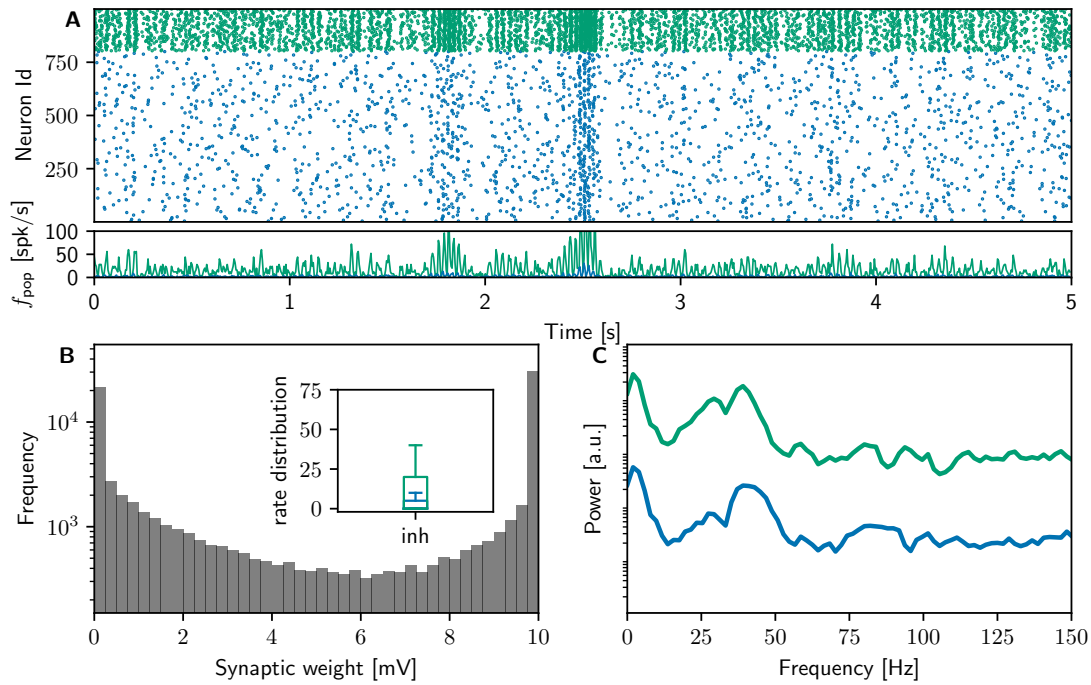

| A                                |                  |
|----------------------------------|------------------|
| <b>simulation-params</b>         |                  |
| rec_spikes                       | 10000.0          |
| resolution                       | 1.0              |
| sim-time                         | 18000000.0       |
| rec_mem                          | 0.0              |
| synapse-update-interval          | 1000             |
| neuron-integration-steps         | 1                |
| data-path                        | data/NEST_model/ |
| B                                |                  |
| <b>stimulus</b>                  |                  |
| distribution                     | original         |
| type                             | generate         |
| C                                |                  |
| <b>plasticity</b>                |                  |
| W_inh                            | -5.0             |
| synapse-model                    | stdp_izh_synapse |
| Wmax                             | 10.0             |
| W_init                           | 6.0              |
| LTP                              | 0.1              |
| tau_syn_update_interval          | 10000.0          |
| reset_weight_change_after_update | False            |
| constant_additive_value          | 0.01             |
| LTD                              | -0.12            |
| D                                |                  |
| <b>connectivity</b>              |                  |
| type                             | generate         |
| delay-distribution               | uniform-random   |
| delay-range                      | [1, 16]          |
| E                                |                  |
| <b>initial-state</b>             |                  |
| type                             | generate         |
| distribution                     | uniform          |
| V_m-range                        | [-65, -55]       |

Parameters for experiment delay distribution 15

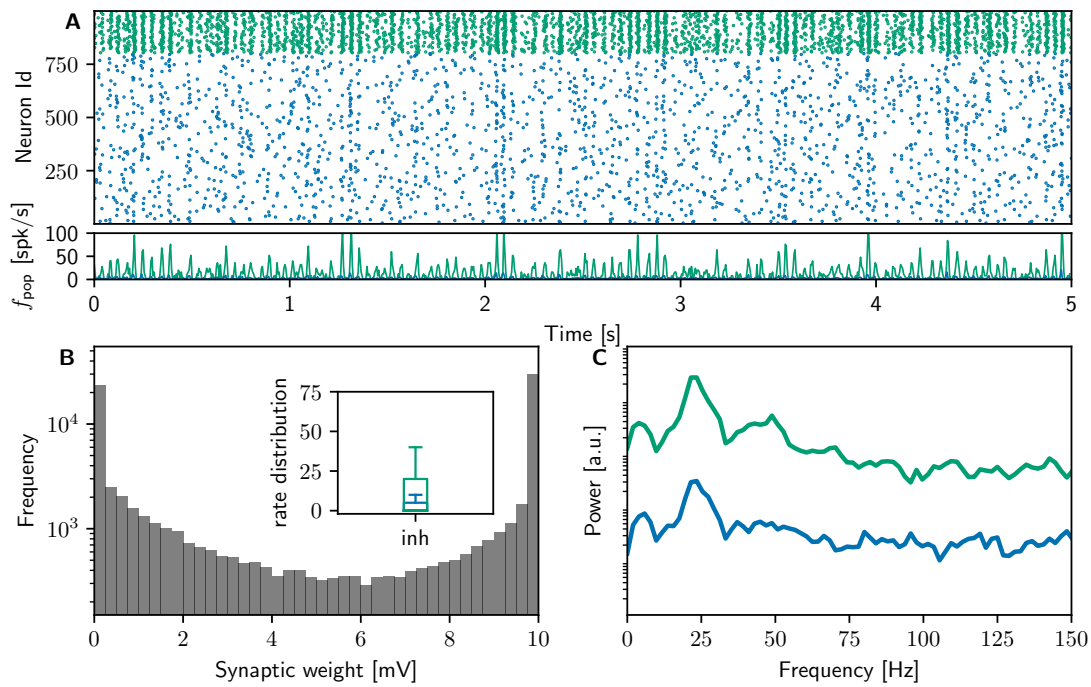

| <b>A</b> simulation-params       |                  |
|----------------------------------|------------------|
| rec_spikes                       | 10000.0          |
| resolution                       | 1.0              |
| sim-time                         | 18000000.0       |
| rec_mem                          | 0.0              |
| synapse-update-interval          | 1000             |
| neuron-integration-steps         | 1                |
| data-path                        | data/NEST_model/ |
| <b>B</b> stimulus                |                  |
| distribution                     | original         |
| type                             | generate         |
| <b>C</b> plasticity              |                  |
| W_inh                            | -5.0             |
| synapse-model                    | stdp_izh_synapse |
| Wmax                             | 10.0             |
| W_init                           | 6.0              |
| LTP                              | 0.1              |
| tau_syn_update_interval          | 10000.0          |
| reset_weight_change_after_update | False            |
| constant_additive_value          | 0.01             |
| LTD                              | -0.12            |
| <b>D</b> connectivity            |                  |
| type                             | generate         |
| delay-distribution               | uniform-random   |
| delay-range                      | [1, 11]          |
| <b>E</b> initial-state           |                  |
| type                             | generate         |
| distribution                     | uniform          |
| V_m-range                        | [-65, -55]       |

Parameters for experiment delay distribution 10

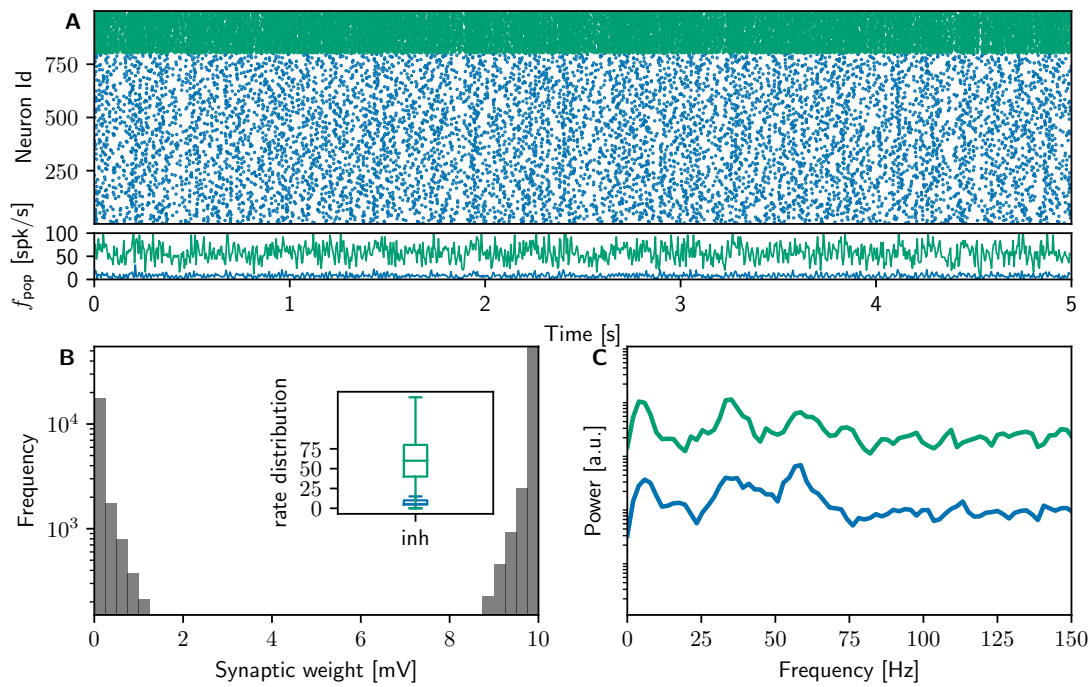

| A                                |  | simulation-params  |  |
|----------------------------------|--|--------------------|--|
| rec_spikes                       |  | 10000.0            |  |
| resolution                       |  | 1.0                |  |
| sim-time                         |  | 18000000.0         |  |
| rec_mem                          |  | 0.0                |  |
| synapse-update-interval          |  | 10000              |  |
| neuron-integration-steps         |  | 1                  |  |
| data-path                        |  | data/NEST_model/   |  |
| B                                |  | stimulus           |  |
| distribution                     |  | original           |  |
| type                             |  | generate           |  |
| C                                |  | plasticity         |  |
| W_inh                            |  | -5.0               |  |
| synapse-model                    |  | stdp_izh_synapse   |  |
| Wmax                             |  | 10.0               |  |
| W_init                           |  | 6.0                |  |
| LTP                              |  | 0.1                |  |
| tau_syn_update_interval          |  | 10000.0            |  |
| reset_weight_change_after_update |  | False              |  |
| constant_additive_value          |  | 0.01               |  |
| LTD                              |  | -0.12              |  |
| D                                |  | connectivity       |  |
| type                             |  | generate           |  |
| delay-distribution               |  | uniform-non-random |  |
| delay-range                      |  | [1, 21]            |  |
| E                                |  | initial-state      |  |
| type                             |  | generate           |  |
| distribution                     |  | uniform            |  |
| V_m-range                        |  | [-65, -55]         |  |

Parameters for experiment synapse update interval 10s

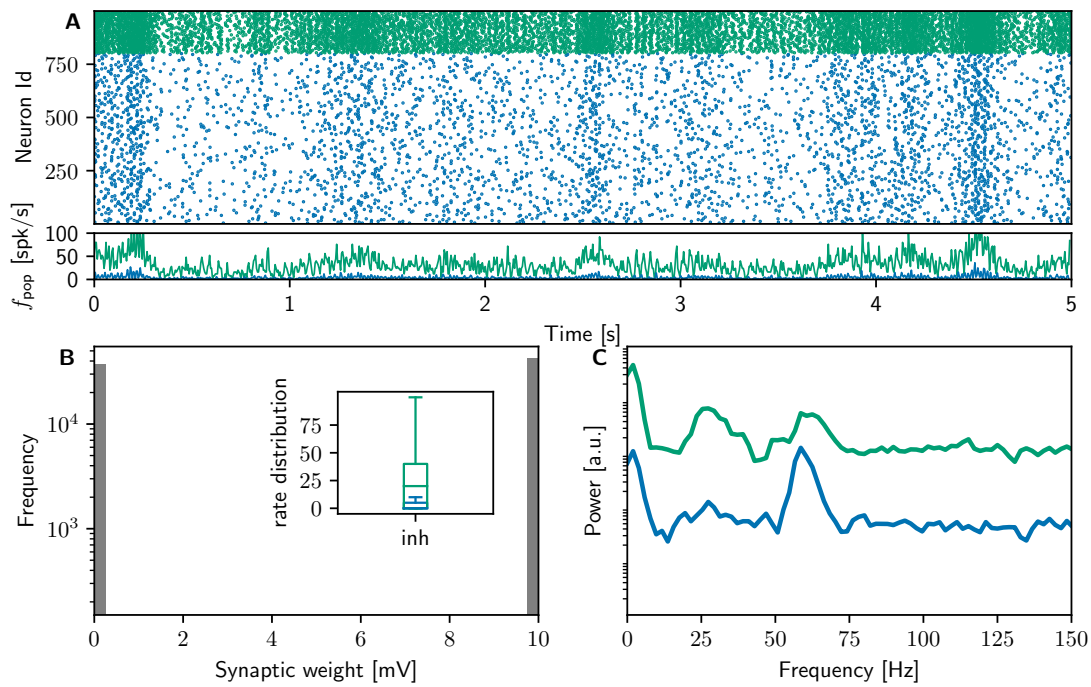

| <b>A</b> simulation-params       |                    |
|----------------------------------|--------------------|
| rec_spikes                       | 10000.0            |
| resolution                       | 1.0                |
| sim-time                         | 18000000.0         |
| rec_mem                          | 0.0                |
| synapse-update-interval          | 1000               |
| neuron-integration-steps         | 1                  |
| data-path                        | data/NEST_model/   |
| <b>B</b> stimulus                |                    |
| distribution                     | original           |
| type                             | generate           |
| <b>C</b> plasticity              |                    |
| W_inh                            | -5.0               |
| synapse-model                    | stdp_izh_synapse   |
| Wmax                             | 10.0               |
| W_init                           | 6.0                |
| LTP                              | 0.1                |
| tau_syn_update_interval          | 100000.0           |
| reset_weight_change_after_update | False              |
| constant_additive_value          | 0.01               |
| LTD                              | -0.12              |
| <b>D</b> connectivity            |                    |
| type                             | generate           |
| delay-distribution               | uniform-non-random |
| delay-range                      | [1, 21]            |
| <b>E</b> initial-state           |                    |
| type                             | generate           |
| distribution                     | uniform            |
| V_m-range                        | [-65, -55]         |

Parameters for experiment tau syn update interval 1000s

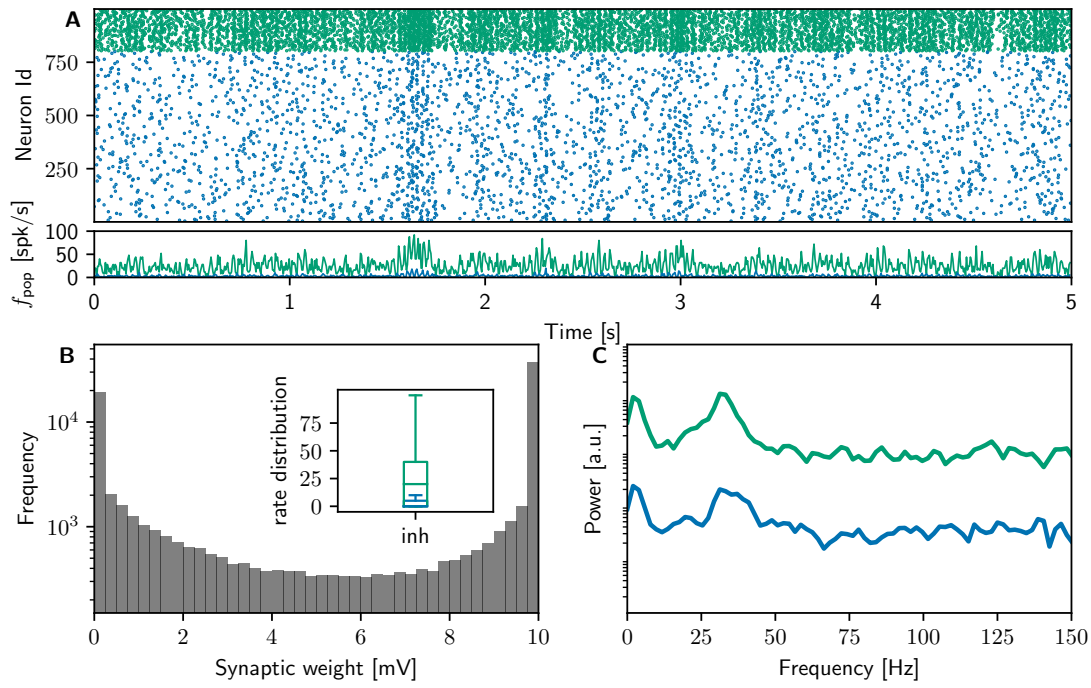

| <b>A</b> simulation-params       |                  |
|----------------------------------|------------------|
| rec_spikes                       | 10000.0          |
| resolution                       | 1.0              |
| sim-time                         | 18000000.0       |
| rec_mem                          | 0.0              |
| synapse-update-interval          | 1000             |
| neuron-integration-steps         | 1                |
| data-path                        | data/NEST_model/ |
| <b>B</b> stimulus                |                  |
| distribution                     | original         |
| type                             | generate         |
| <b>C</b> plasticity              |                  |
| W_inh                            | -5.0             |
| synapse-model                    | stdp_izh_synapse |
| Wmax                             | 10.0             |
| W_init                           | 6.0              |
| LTP                              | 0.1              |
| tau_syn_update_interval          | 10000.0          |
| reset_weight_change_after_update | False            |
| constant_additive_value          | 0.01             |
| LTD                              | -0.12            |
| <b>D</b> connectivity            |                  |
| type                             | generate         |
| delay-distribution               | uniform-random   |
| delay-range                      | [1, 21]          |
| <b>E</b> initial-state           |                  |
| type                             | generate         |
| distribution                     | uniform          |
| V_m-range                        | [-65, -55]       |

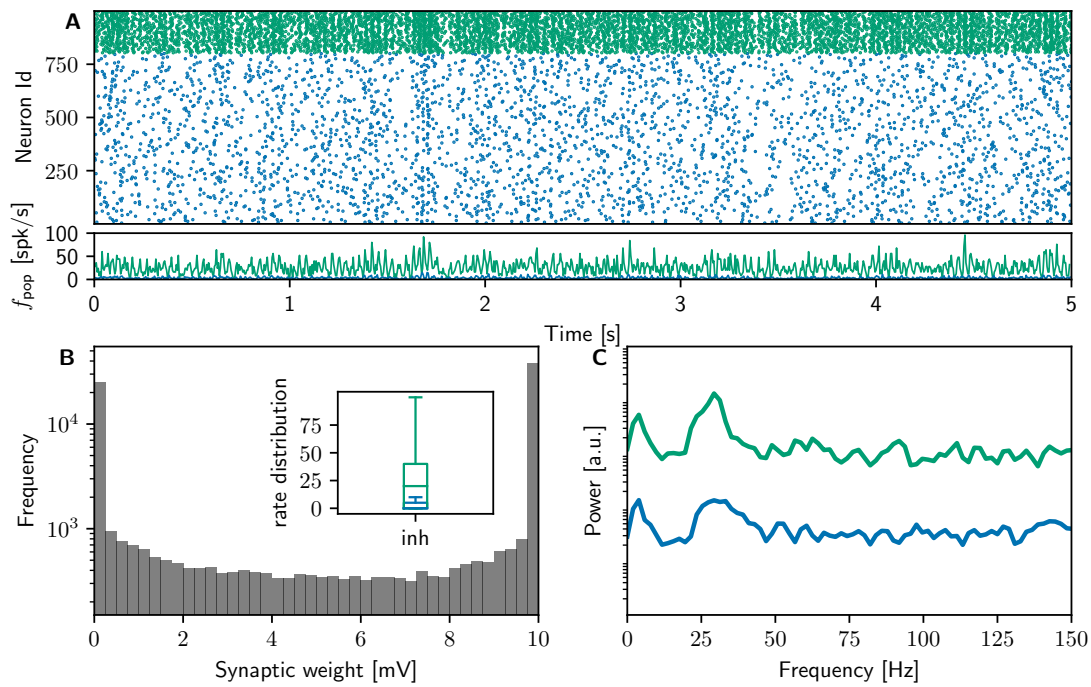

| <b>A</b> simulation-params       |                    |
|----------------------------------|--------------------|
| rec_spikes                       | 10000.0            |
| resolution                       | 1.0                |
| sim-time                         | 18000000.0         |
| rec_mem                          | 0.0                |
| synapse-update-interval          | 100                |
| neuron-integration-steps         | 1                  |
| data-path                        | data/NEST_model/   |
| <b>B</b> stimulus                |                    |
| distribution                     | original           |
| type                             | generate           |
| <b>C</b> plasticity              |                    |
| W_inh                            | -5.0               |
| synapse-model                    | stdp_izh_synapse   |
| Wmax                             | 10.0               |
| W_init                           | 6.0                |
| LTP                              | 0.1                |
| tau_syn_update_interval          | 10000.0            |
| reset_weight_change_after_update | False              |
| constant_additive_value          | 0.01               |
| LTD                              | -0.12              |
| <b>D</b> connectivity            |                    |
| type                             | generate           |
| delay-distribution               | uniform-non-random |
| delay-range                      | [1, 21]            |
| <b>E</b> initial-state           |                    |
| type                             | generate           |
| distribution                     | uniform            |
| V_m-range                        | [-65, -55]         |

Parameters for experiment synapse update interval 0p1s

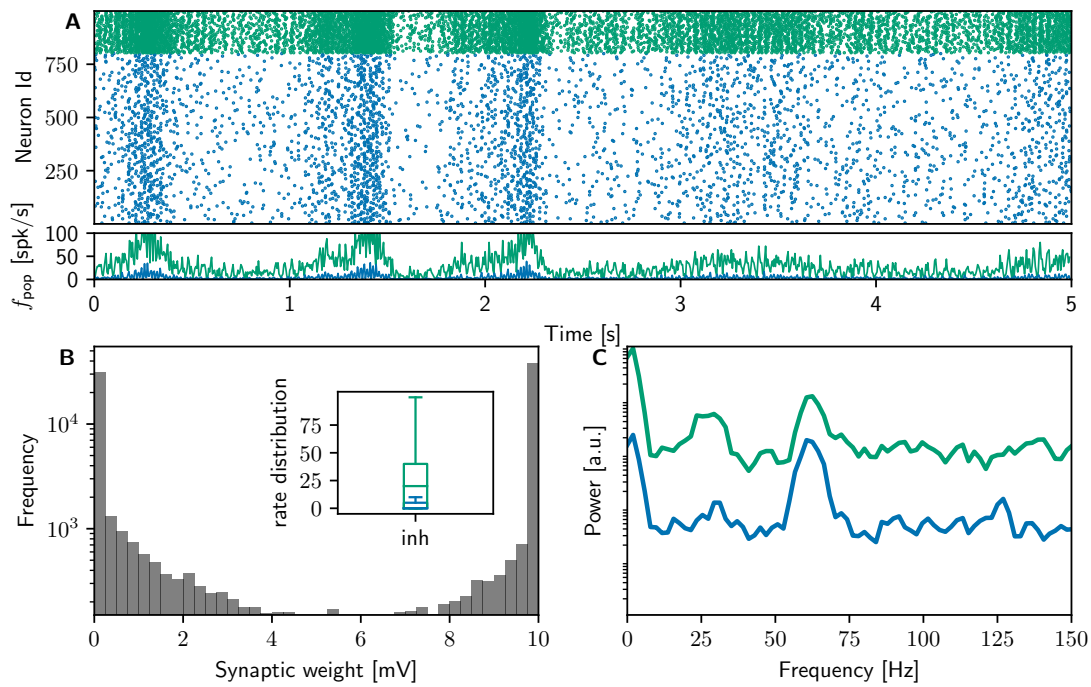

| A simulation-params      |                                                                  |
|--------------------------|------------------------------------------------------------------|
| rec_spikes               | 10000.0                                                          |
| resolution               | 1.0                                                              |
| sim-time                 | 18000000.0                                                       |
| rec_mem                  | 2000.0                                                           |
| synapse-update-interval  | 1000                                                             |
| neuron-integration-steps | 1                                                                |
| data-path                | data/NEST_model/                                                 |
| B stimulus               |                                                                  |
| type                     | reproduce                                                        |
| from-file                | data/original_model/bitwise_reproduction/{rep}/stim.dat          |
| C plasticity             |                                                                  |
| W_inh                    | -5.0                                                             |
| synapse-model            | stdp_izh_bitwise_correct_synapse                                 |
| Wmax                     | 10.0                                                             |
| W_init                   | 6.0                                                              |
| LTP                      | 0.1                                                              |
| LTD                      | -0.12                                                            |
| D connectivity           |                                                                  |
| type                     | reproduce                                                        |
| from-file                | data/original_model/bitwise_reproduction/{rep}/connectivity.json |
| E initial-state          |                                                                  |
| type                     | reproduce                                                        |
| from-file                | data/original_model/bitwise_reproduction/{rep}/vuinit.dat        |

Parameters for experiment bitwise reproduction



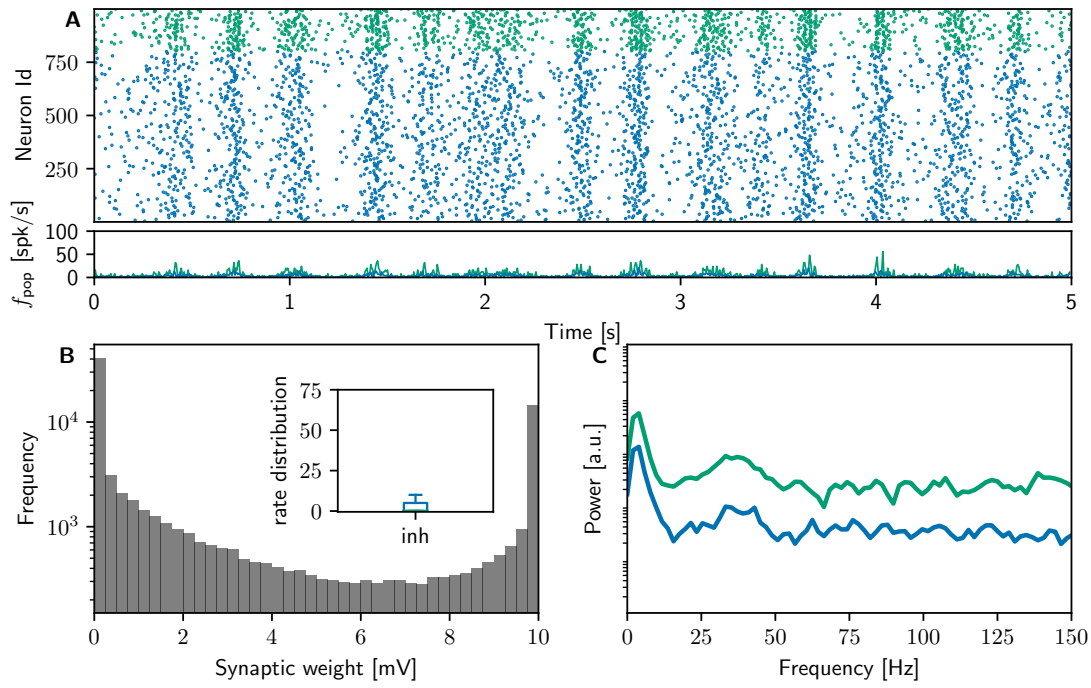

| A simulation-params      |                                                                  |
|--------------------------|------------------------------------------------------------------|
| rec_spikes               | 10000.0                                                          |
| resolution               | 1.0                                                              |
| sim-time                 | 18000000.0                                                       |
| rec_mem                  | 0.0                                                              |
| synapse-update-interval  | 1000                                                             |
| neuron-integration-steps | 1                                                                |
| data-path                | data/NEST_model/                                                 |
| B stimulus               |                                                                  |
| type                     | reproduce                                                        |
| from-file                | data/original_model/bitwise_reproduction/{rep}/stim.dat          |
| C plasticity             |                                                                  |
| W_inh                    | -5.0                                                             |
| synapse-model            | stdp_izh_naive_synapse                                           |
| Wmax                     | 10.0                                                             |
| W_init                   | 6.0                                                              |
| LTP                      | 0.1                                                              |
| LTD                      | -0.12                                                            |
| D connectivity           |                                                                  |
| type                     | reproduce                                                        |
| from-file                | data/original_model/bitwise_reproduction/{rep}/connectivity.json |
| E initial-state          |                                                                  |
| type                     | reproduce                                                        |
| from-file                | data/original_model/bitwise_reproduction/{rep}/vuinit.dat        |

Parameters for experiment initial reproduction

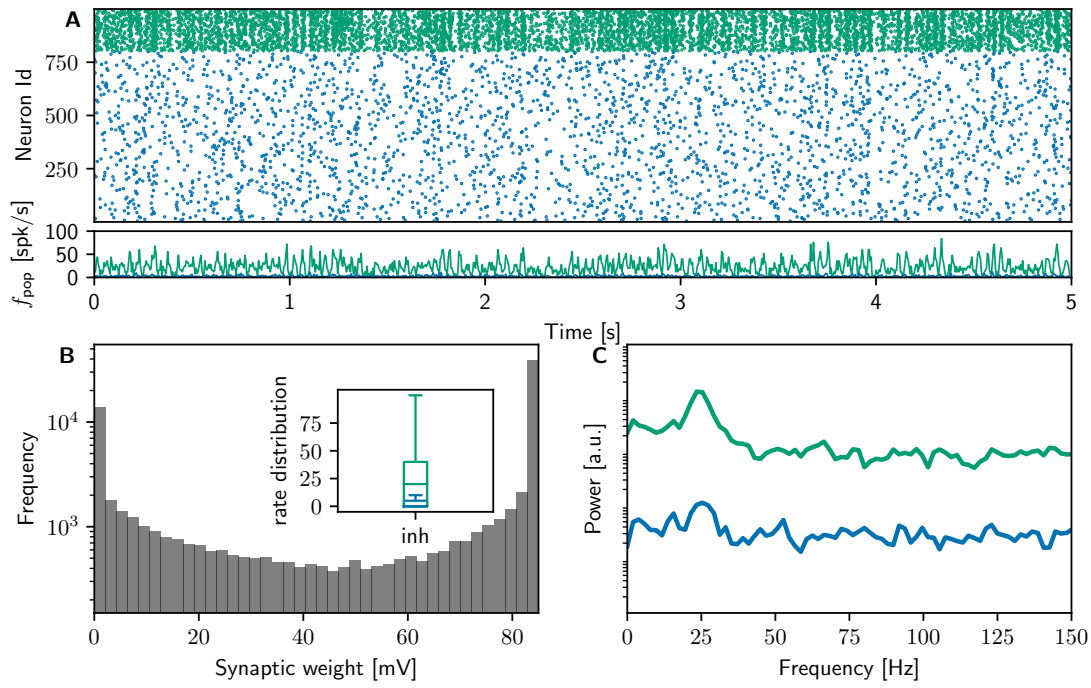

| A                                |                  |
|----------------------------------|------------------|
| <b>simulation-params</b>         |                  |
| rec_spikes                       | 10000.0          |
| resolution                       | 0.1              |
| sim-time                         | 18000000.0       |
| rec_mem                          | 1000.0           |
| synapse-update-interval          | 1000             |
| neuron-integration-steps         | 1                |
| data-path                        | data/NEST_model/ |
| B                                |                  |
| <b>stimulus</b>                  |                  |
| distribution                     | original         |
| type                             | generate         |
| C                                |                  |
| <b>plasticity</b>                |                  |
| W_inh                            | -35.0            |
| synapse-model                    | stdp_izh_synapse |
| Wmax                             | 85.0             |
| W_init                           | 50.0             |
| LTP                              | 0.85             |
| tau_syn_update_interval          | 10000.0          |
| reset_weight_change_after_update | False            |
| constant_additive_value          | 0.085            |
| LTD                              | -1.02            |
| D                                |                  |
| <b>connectivity</b>              |                  |
| type                             | generate         |
| delay-distribution               | uniform-random   |
| delay-range                      | [1, 21]          |
| E                                |                  |
| <b>initial-state</b>             |                  |
| type                             | generate         |
| distribution                     | uniform          |
| V_m-range                        | [-65, -55]       |

Parameters for experiment resolution 0p1 W pspmatched

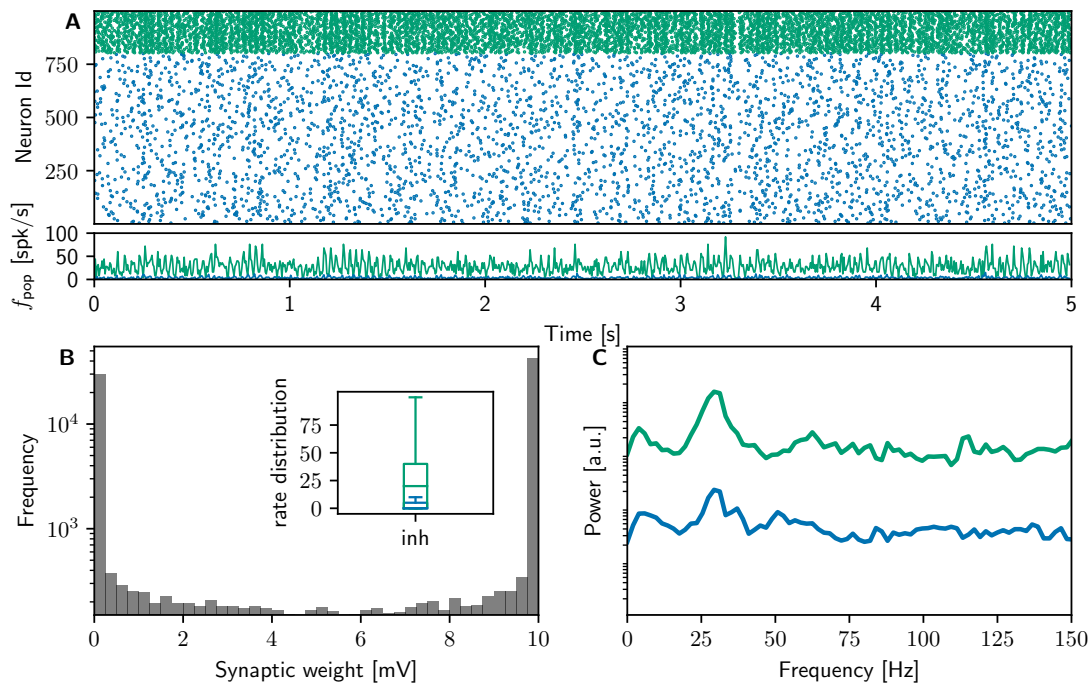

| <b>A</b> simulation-params       |                    |
|----------------------------------|--------------------|
| rec_spikes                       | 10000.0            |
| resolution                       | 1.0                |
| sim-time                         | 18000000.0         |
| rec_mem                          | 0.0                |
| synapse-update-interval          | 10                 |
| neuron-integration-steps         | 1                  |
| data-path                        | data/NEST_model/   |
| <b>B</b> stimulus                |                    |
| distribution                     | original           |
| type                             | generate           |
| <b>C</b> plasticity              |                    |
| W_inh                            | -5.0               |
| synapse-model                    | stdp_izh_synapse   |
| Wmax                             | 10.0               |
| W_init                           | 6.0                |
| LTP                              | 0.1                |
| tau_syn_update_interval          | 10000.0            |
| reset_weight_change_after_update | False              |
| constant_additive_value          | 0.01               |
| LTD                              | -0.12              |
| <b>D</b> connectivity            |                    |
| type                             | generate           |
| delay-distribution               | uniform-non-random |
| delay-range                      | [1, 21]            |
| <b>E</b> initial-state           |                    |
| type                             | generate           |
| distribution                     | uniform            |
| V_m-range                        | [-65, -55]         |

Parameters for experiment synapse update interval 0p01s

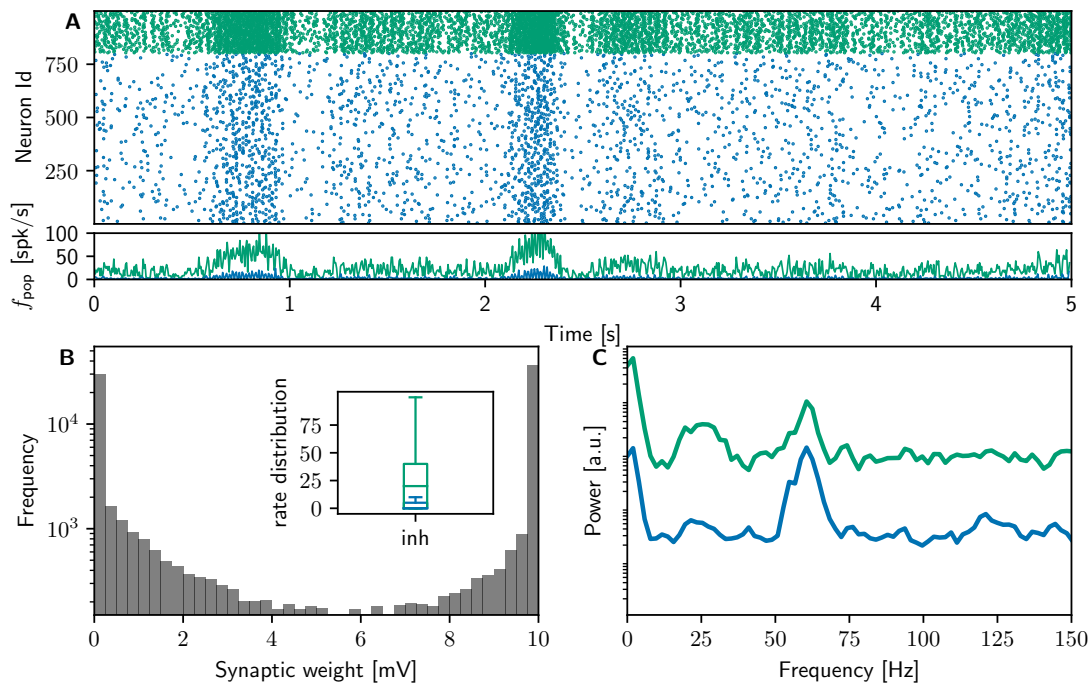

| <b>A</b> simulation-params       |                    |
|----------------------------------|--------------------|
| rec_spikes                       | 10000.0            |
| resolution                       | 1.0                |
| sim-time                         | 18000000.0         |
| rec_mem                          | 0.0                |
| synapse-update-interval          | 1000               |
| neuron-integration-steps         | 1                  |
| data-path                        | data/NEST_model/   |
| <b>B</b> stimulus                |                    |
| distribution                     | original           |
| type                             | generate           |
| <b>C</b> plasticity              |                    |
| W_inh                            | -5.0               |
| synapse-model                    | stdp_izh_synapse   |
| Wmax                             | 10.0               |
| W_init                           | 6.0                |
| LTP                              | 0.1                |
| tau_syn_update_interval          | 10000.0            |
| reset_weight_change_after_update | False              |
| constant_additive_value          | 0.0                |
| LTD                              | -0.12              |
| <b>D</b> connectivity            |                    |
| type                             | generate           |
| delay-distribution               | uniform-non-random |
| delay-range                      | [1, 21]            |
| <b>E</b> initial-state           |                    |
| type                             | generate           |
| distribution                     | uniform            |
| V_m-range                        | [-65, -55]         |

Parameters for experiment const add value 0p0

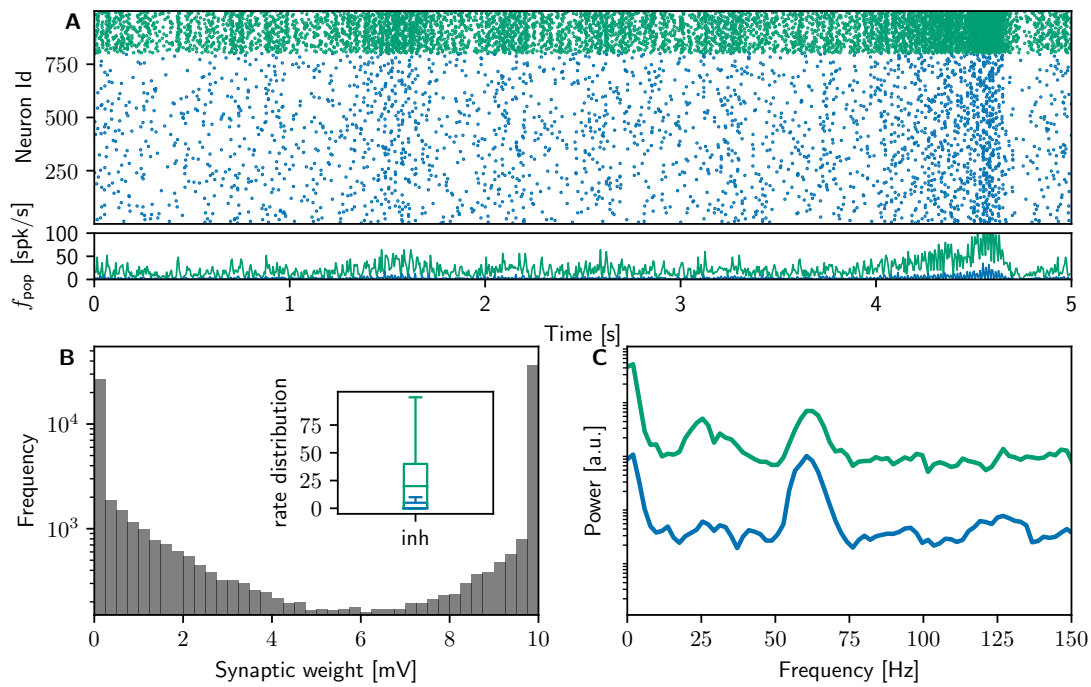

| <b>A</b> simulation-params       |                    |
|----------------------------------|--------------------|
| rec_spikes                       | 10000.0            |
| resolution                       | 1.0                |
| sim-time                         | 18000000.0         |
| rec_mem                          | 0.0                |
| synapse-update-interval          | 1000               |
| neuron-integration-steps         | 1                  |
| data-path                        | data/NEST_model/   |
| <b>B</b> stimulus                |                    |
| distribution                     | original           |
| type                             | generate           |
| <b>C</b> plasticity              |                    |
| W_inh                            | -5.0               |
| synapse-model                    | stdp_izh_synapse   |
| Wmax                             | 10.0               |
| W_init                           | 6.0                |
| LTP                              | 0.1                |
| tau_syn_update_interval          | 10000.0            |
| reset_weight_change_after_update | False              |
| constant_additive_value          | 0.01               |
| LTD                              | -0.12              |
| <b>D</b> connectivity            |                    |
| type                             | generate           |
| delay-distribution               | uniform-non-random |
| delay-range                      | [1, 21]            |
| <b>E</b> initial-state           |                    |
| type                             | generate           |
| distribution                     | uniform            |
| V_m-range                        | [-65, -55]         |

Parameters for experiment qualitative model
